# Supplementary material
Source: PubMed Central journal article supplement (PMC5516631)
Supplement: NIHMS872284-supplement-supplement_1.pdf [file NIHMS872284-supplement-supplement_1.pdf]

## Asthma Control & Communication Instrument

Your name: \_\_\_\_\_

Today's date: \_\_\_/\_\_\_/\_\_\_  
month    day    year

Please check  one answer for each of the following questions.  
Your answers will help your doctor give you the best asthma care.

| Direction                                                                                                                                                                                                                                                                                                            |                                                                                    |                                                    |                                                   |                                                   |                                                  |
|----------------------------------------------------------------------------------------------------------------------------------------------------------------------------------------------------------------------------------------------------------------------------------------------------------------------|------------------------------------------------------------------------------------|----------------------------------------------------|---------------------------------------------------|---------------------------------------------------|--------------------------------------------------|
| <p>1. Since your last visit to <b>this</b> doctor's office, how has your asthma been?</p> <div style="border: 1px solid black; padding: 5px; margin-top: 10px;">                     If this is your first visit to this doctor, please answer about the past 2 months.                 </div>                       | Better<br>▼<br><input type="checkbox"/>                                            | Same<br>▼<br><input type="checkbox"/>              | Worse<br>▼<br><input type="checkbox"/>            |                                                   |                                                  |
| Bothered                                                                                                                                                                                                                                                                                                             |                                                                                    |                                                    |                                                   |                                                   |                                                  |
| <p>2. Since your last visit to <b>this</b> doctor's office, how much have you been bothered by your asthma?</p> <div style="border: 1px solid black; padding: 5px; margin-top: 10px;">                     If this is your first visit to this doctor, please answer about the past 2 months.                 </div> | Not bothered<br>▼<br><input type="checkbox"/>                                      | Somewhat bothered<br>▼<br><input type="checkbox"/> | Very bothered<br>▼<br><input type="checkbox"/>    |                                                   |                                                  |
| Risk                                                                                                                                                                                                                                                                                                                 |                                                                                    |                                                    |                                                   |                                                   |                                                  |
| <p>3-5. Since your last visit to <b>this</b> doctor's office, have you:</p> <div style="border: 1px solid black; padding: 5px; margin-top: 10px;">                     If this is your first visit to this doctor, please answer about the past 2 months.                 </div>                                     | No<br>▼<br><input type="checkbox"/>                                                | Yes<br>▼<br><input type="checkbox"/>               |                                                   |                                                   |                                                  |
| <p>3. Been to the emergency room for your asthma?</p>                                                                                                                                                                                                                                                                | <input type="checkbox"/>                                                           | <input type="checkbox"/>                           |                                                   |                                                   |                                                  |
| <p>4. Been hospitalized for your asthma?</p>                                                                                                                                                                                                                                                                         | <input type="checkbox"/>                                                           | <input type="checkbox"/>                           |                                                   |                                                   |                                                  |
| <p>5. Used prednisone (steroid pill, steroid liquid or steroid syrup) for your asthma?</p>                                                                                                                                                                                                                           | <input type="checkbox"/>                                                           | <input type="checkbox"/>                           |                                                   |                                                   |                                                  |
| Forget to take medicine                                                                                                                                                                                                                                                                                              |                                                                                    |                                                    |                                                   |                                                   |                                                  |
| <p>6. How often do you forget to take your <b>daily</b> asthma medicine when you feel fine?</p>                                                                                                                                                                                                                      | I am not supposed to take a daily asthma medicine<br>▼<br><input type="checkbox"/> | None of the time<br>▼<br><input type="checkbox"/>  | Some of the time<br>▼<br><input type="checkbox"/> | Most of the time<br>▼<br><input type="checkbox"/> | All of the time<br>▼<br><input type="checkbox"/> |

FIG E1. The final version of the Asthma Control and Communication Instrument.

### Asthma Control Questions

#### Asthma Symptoms

7. Over the **past week**, how many days have you had asthma symptoms? For example:

|                                                                                                                                                                                                                                                                         |             |     |     |                                 |                             |
|-------------------------------------------------------------------------------------------------------------------------------------------------------------------------------------------------------------------------------------------------------------------------|-------------|-----|-----|---------------------------------|-----------------------------|
|                                                                                                                                                                                                                                                                         | <b>Days</b> |     |     |                                 |                             |
|                                                                                                                                                                                                                                                                         | 0           | 1-2 | 3-6 | Every day<br>(not all day long) | Every day<br>(all day long) |
| <ul style="list-style-type: none"> <li>▪ Cough</li> <li>▪ Chest tightness</li> <li>▪ Shortness of breath</li> <li>▪ Sputum (spit, mucous, phlegm when coughing)</li> <li>▪ Difficulty taking a deep breath</li> <li>▪ Wheezy or whistling sound in the chest</li> </ul> |             |     |     |                                 |                             |

#### Reliever use

8. Over the **past week**, how many days have you had to use medicine to quickly relieve your asthma? For example:

|                                                                                                                                                           |             |     |     |                                 |                             |
|-----------------------------------------------------------------------------------------------------------------------------------------------------------|-------------|-----|-----|---------------------------------|-----------------------------|
|                                                                                                                                                           | <b>Days</b> |     |     |                                 |                             |
|                                                                                                                                                           | 0           | 1-2 | 3-6 | Every day<br>(not all day long) | Every day<br>(all day long) |
| <ul style="list-style-type: none"> <li>▪ Albuterol</li> <li>▪ Inhaler</li> <li>▪ Spray</li> <li>▪ Pump</li> <li>▪ Machine</li> <li>▪ Nebulizer</li> </ul> |             |     |     |                                 |                             |

#### Attacks

9. Over the **past week**, how many days did you have an asthma attack? For example:

|                                                                                                                                                                           |             |   |     |     |
|---------------------------------------------------------------------------------------------------------------------------------------------------------------------------|-------------|---|-----|-----|
|                                                                                                                                                                           | <b>Days</b> |   |     |     |
|                                                                                                                                                                           | 0           | 1 | 2-3 | 4-7 |
| <ul style="list-style-type: none"> <li>▪ When it is harder to breathe</li> <li>▪ When you use more asthma medicine</li> <li>▪ When your medicine does not work</li> </ul> |             |   |     |     |

#### Activity Limitation

10. Over the **past week**, how much did your asthma limit your activities?

|  |            |          |            |           |            |
|--|------------|----------|------------|-----------|------------|
|  | Not at all | Slightly | Moderately | Very much | Completely |
|  |            |          |            |           |            |

#### Nighttime Symptoms

11. Now for this question, please answer about the **past 2 weeks**.

How many nights did **your asthma** keep you from sleeping or wake you up in the **past 2 weeks**?

|  |               |   |   |     |      |
|--|---------------|---|---|-----|------|
|  | <b>Nights</b> |   |   |     |      |
|  | 0             | 1 | 2 | 3-7 | 8-14 |
|  |               |   |   |     |      |

**For clinician use only – Asthma Control Assignment**

Assign patient's current level of asthma control by looking at box checked farthest to the right on questions 7-11 and match color of this box to level of asthma control in this section and circle and/or document in patient's chart.

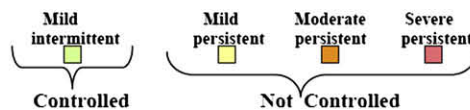

(Continued).

12. Please write down anything else you would like your doctor to know about **your asthma.**

---

---

---

---

---

**Thank you very much for taking the time to answer this questionnaire!**

*(Continued).*

**TABLE E1.** ACCI Control domain scoring values among participants (n = 270)

| <b>ACCI categories</b> | <b>Percentage</b> | <b>ACCI sum score,<br/>mean (95% CI)</b> | <b>ACCI problem<br/>index, mean (95% CI)</b> |
|------------------------|-------------------|------------------------------------------|----------------------------------------------|
| Mild-intermittent      | 5                 | 1 (0.7-1.9)                              | 0                                            |
| Mild-persistent        | 24                | 4 (3.7-4.6)                              | 1.8 (1.6-2.0)                                |
| Moderate-persistent    | 45                | 9 (8.1-9.1)                              | 3.5 (3.3-3.7)                                |
| Severe-persistent      | 26                | 13 (12.5-14.1)                           | 4.4 (4.2-4.7)                                |

**TABLE E2.** ACCI PCA and internal consistency reliability (n = 270)

|                                                    | Components     |            | Global perception<br>of asthma burden | Adherence      |
|----------------------------------------------------|----------------|------------|---------------------------------------|----------------|
|                                                    | Asthma control | Acute care |                                       |                |
| Asthma attacks                                     | 0.792          | -0.041     | 0.095                                 | -0.074         |
| Reliever use                                       | 0.735          | 0.086      | 0.104                                 | 0.143          |
| Activity limitation                                | 0.734          | 0.167      | 0.147                                 | -0.075         |
| Nocturnal symptoms                                 | 0.715          | 0.151      | 0.102                                 | -0.081         |
| Asthma symptoms                                    | 0.677          | 0.082      | 0.282                                 | 0.066          |
| Hospitalizations                                   | 0.055          | 0.844      | 0.129                                 | 0.073          |
| ED visits                                          | 0.073          | 0.824      | 0.215                                 | -0.116         |
| Oral steroid use                                   | 0.238          | 0.610      | -0.359                                | 0.019          |
| Direction (better, same, worse)                    | 0.223          | -0.020     | 0.800                                 | 0.018          |
| Bother                                             | 0.395          | 0.204      | 0.628                                 | 0.079          |
| Adherence                                          | -0.023         | -0.018     | 0.027                                 | 0.978          |
| Internal consistency reliability Cronbach $\alpha$ | 0.800          | 0.590      | 0.573                                 | Not applicable |

Extraction method, PCA; rotation method, varimax with Kaiser normalization.  
ED, Emergency department.

**TABLE E3.** ACCI discriminant properties: Mean (95% CI) asthma control, QOL, and spirometric values across ACCI control categories by using ANOVA by race (black and white subjects)

|                                    | ACCI<br>Mild-intermittent | ACCI<br>Mild-persistent | ACCI<br>Moderate-persistent | ACCI<br>Severe-persistent | P trend |
|------------------------------------|---------------------------|-------------------------|-----------------------------|---------------------------|---------|
| Asthma control measures            |                           |                         |                             |                           |         |
| ACT black                          | 19                        | 18                      | 15                          | 13                        | <.001   |
| ACT white                          | 23                        | 19                      | 15                          | 11                        | <.001   |
| ACQ black                          | 1.6                       | 2                       | 2.7                         | 3.3                       | <.001   |
| ACQ white                          | 1                         | 2                       | 2.7                         | 3.3                       | <.001   |
| ATAQ black                         | 0.75                      | 0.95                    | 1.7                         | 2                         | <.001   |
| ATAQ white                         | 0.67                      | 0.72                    | 1.7                         | 2                         | <.001   |
| QOL measures                       |                           |                         |                             |                           |         |
| m-AQLQ domains                     |                           |                         |                             |                           |         |
| Overall black                      | 5.6                       | 5.1                     | 4.6                         | 3.6                       | .001    |
| Overall white                      | 6.6                       | 5.4                     | 4.4                         | 3.5                       | .001    |
| Symptom black                      | 5.6                       | 5.2                     | 4.4                         | 3.4                       | <.001   |
| Symptom white                      | 6.6                       | 5.1                     | 4.3                         | 3.4                       | <.001   |
| Activity black                     | 6.5                       | 5.6                     | 5.1                         | 4.2                       | <.001   |
| Activity white                     | 6.8                       | 5.7                     | 4.9                         | 3.8                       |         |
| Environmental black                | 5.0                       | 4.5                     | 4.1                         | 3.2                       | <.001   |
| Environmental white                | 6.0                       | 5.2                     | 3.9                         | 3.2                       | <.001   |
| Emotional black                    | 5.4                       | 5.1                     | 4.8                         | 3.7                       | .002    |
| Emotional white                    | 6.9                       | 5.5                     | 4.5                         | 4.2                       | .002    |
| SGRQ domains                       |                           |                         |                             |                           |         |
| Overall black                      | 25                        | 38                      | 41                          | 53                        | <.001   |
| Overall white                      | 26                        | 38                      | 46                          | 57                        | .001    |
| Symptom black                      | 54                        | 53                      | 59                          | 67                        | .001    |
| Symptom white                      | 30                        | 60                      | 58                          | 73                        | .002    |
| Activity black                     | 33                        | 51                      | 55                          | 66                        | .002    |
| Activity white                     | 19                        | 48                      | 60                          | 71                        | .003    |
| Impact black                       | 12                        | 27                      | 27                          | 41                        | <.001   |
| Impact white                       | 29                        | 26                      | 34                          | 44                        | .007    |
| SF-36 domains                      |                           |                         |                             |                           |         |
| Physical CS black                  | 46                        | 45                      | 41                          | 33                        | .005    |
| Physical CS white                  | 50                        | 41                      | 37                          | 30                        | .005    |
| Mental CS black                    | 55                        | 45                      | 45                          | 43                        | .332    |
| Mental CS white                    | 14                        | 44                      | 43                          | 45                        | .176    |
| Spirometric values                 |                           |                         |                             |                           |         |
| FEV <sub>1</sub> (L) black         | 2                         | 2                       | 2                           | 1.9                       | .433    |
| FEV <sub>1</sub> (L) white         | 3.3                       | 2.5                     | 2.2                         | 2.1                       | .011    |
| FEV <sub>1</sub> % predicted black | 80                        | 76                      | 74                          | 72                        | .334    |
| FEV <sub>1</sub> % predicted white | 93                        | 73                      | 74                          | 68                        | .151    |
| PEFR (L/s) black                   | 5.4                       | 4.7                     | 4.5                         | 4.1                       | .035    |
| PEFR (L/s) white                   | 8.2                       | 5.7                     | 4.8                         | 4.9                       | .007    |
| PEFR % predicted black             | 86                        | 71                      | 68                          | 62                        | .021    |
| PEFR % predicted white             | 101                       | 76                      | 75                          | 70                        | .076    |

CS, Component score.
